# Supplementary material
Source: HighWire-hosted journal article supplement (https://bmjopen.bmj.com/content/14/12/e082704)
Supplement: inline-supplementary-material-1 [file inline-supplementary-material-1.pdf]

## Supplemental file

### Search Strategy

**Databases search:** MEDLINE Ovid, PubMed, Web of Science, CINAHL and Scopus

**Keywords used:** “centre of clinical excellence” OR “networks of excellence” OR “best practice” OR “clinical exemplars” OR “integrated healthcare delivery” OR “excellence” OR “clinical protocols” OR “clinical competence” as search terms, subject headings, concepts or keywords.

MEDLINE Ovid

((((centre\* or network\* or best practice or institute\*) adj3 clinical excellence) or center of excellence or centre of excellence).ti,ab,kf.

CoE – Centre of Excellence

\*Research article in peer reviewed journal

<sup>#</sup>Other in peer reviewed journal

<sup>^</sup>Case report in peer reviewed journal
