# Supplementary material
Source: HighWire-hosted journal article supplement (https://bmjopen.bmj.com/content/14/12/e082704)
Supplement: inline-supplementary-material-3 [file inline-supplementary-material-3.pdf]

**Table S1: Description of the aim and type of publication and information on how CoCE were described in the initiatives.**

| 1 <sup>st</sup> Author         | Country / Region | Aim of publication                                                                                                            | Type of publication          | How is CoCE described in the study                               |                       |                                                                              |                                                                                                                                                                                                                                                                                                                                                                                           |                                        |                                                                                                                                                                                                                                                                                                                                                                     |
|--------------------------------|------------------|-------------------------------------------------------------------------------------------------------------------------------|------------------------------|------------------------------------------------------------------|-----------------------|------------------------------------------------------------------------------|-------------------------------------------------------------------------------------------------------------------------------------------------------------------------------------------------------------------------------------------------------------------------------------------------------------------------------------------------------------------------------------------|----------------------------------------|---------------------------------------------------------------------------------------------------------------------------------------------------------------------------------------------------------------------------------------------------------------------------------------------------------------------------------------------------------------------|
|                                |                  |                                                                                                                               |                              | Name of CoCE                                                     | Year CoCE established | Framework adapted/created                                                    | Function of CoCE                                                                                                                                                                                                                                                                                                                                                                          | Clinical focus area of CoCE            | Resources                                                                                                                                                                                                                                                                                                                                                           |
| Bitzer et al <sup>1</sup>      | Europe           | Describing the framework and characteristics of an "ideal" CoE of Sexual Medicine and Sexual Therapy                          | Other <sup>#</sup>           | Centre of Excellence for Sexual Medicine                         | Not reported          | Created by authors                                                           | Diagnosis and treatment of Sexual dysfunction. Aim to <ul style="list-style-type: none"> <li>To provide a frame for patient-centred and relationship-based care</li> <li>To provide multidisciplinary diagnostic assessment, individualized therapeutic options, documentation and follow-up of patients</li> <li>Provide training for medical students, residents and fellows</li> </ul> | Sexual medicine                        | <b>Personnel</b> <ul style="list-style-type: none"> <li>Multi-disciplinary team</li> </ul> <b>Infrastructure</b> <ul style="list-style-type: none"> <li>A room for counselling/therapy</li> <li>Examination room</li> </ul>                                                                                                                                         |
| Burkett et al <sup>2</sup>     | Not reported     | To present the concept of "centers of excellence" and how they are applied to spine care. Provided an overview of spinal CoE. | Book chapter                 | Spine Centre of Excellence                                       | Not reported          | Not reported                                                                 | <ul style="list-style-type: none"> <li>To achieve exceptional quality of spine care at lower cost.</li> <li>To establish a regional presence and a robust patient population.</li> <li>To demonstrate that the organization meets high performance standards.</li> <li>To stand out among other area institutions.</li> </ul>                                                             | Spinal surgeries                       | <b>Personnel</b> <ul style="list-style-type: none"> <li>Specialties involved may include neurosurgery, orthopaedic surgery, rehabilitation, occupational therapy and physical therapy, pain management, specialized nursing, radiology, behaviour medicine, and psychiatry</li> </ul>                                                                               |
| Campbell et al <sup>3</sup>    | India            | Examines the evolution of a Centre of excellence as an innovative model for sustainable cleft care in the developing world    | Research article*            | Operation Smile Guwahati Comprehensive Cleft Care Center (GCCCC) | 2009                  | Created by authors and collaborators from Operation Smile                    | To provide standardized and comprehensive cleft care at one institution, with vision of making Assam a cleft-free state.                                                                                                                                                                                                                                                                  | Cleft palate                           | <b>Personnel</b> <ul style="list-style-type: none"> <li>Healthcare professionals in multiple disciplines</li> </ul> <b>Infrastructure</b> <ul style="list-style-type: none"> <li>Modern surgical suite and clinical space</li> <li>Modern integrated operating suite, advanced surgical equipment, sophisticated anaesthesia and monitoring capabilities</li> </ul> |
| Carvalho and Jill <sup>4</sup> | USA              | To describe designation process of Centres of Excellence in obstetric ant                                                     | Other <sup>#</sup> & Website | CoE for Anaesthesia Care of Obstetric Patients                   | 2018                  | The criteria for Centres of Excellence designation, which covers all aspects | CoE designation process is designed to recognize institutions and programs that demonstrate excellence in obstetric anaesthesia care, to set a benchmark level of expected care to                                                                                                                                                                                                        | Obstetric Anaesthesia and Perinatology | <b>Personnel</b> <ul style="list-style-type: none"> <li>Obstetric anaesthesiologist</li> <li>24/7 coverage of obstetric patients by at least 1 anaesthesiologist</li> </ul>                                                                                                                                                                                         |

CoE – Centre of Excellence

\*Research article in peer reviewed journal

<sup>#</sup>Other in peer reviewed journal<sup>^</sup>Case report in peer reviewed journal

|                                                                                |               |                                                                                                                                                                                                                                                                                                                                                                                                                                               |                              |                                               |                            |                                                                                                                                                                                                            |                                                                                                                                                                                                                                                                                                                                                                                                                                              |                                 |                                                                                                                                                                                                                                                   |
|--------------------------------------------------------------------------------|---------------|-----------------------------------------------------------------------------------------------------------------------------------------------------------------------------------------------------------------------------------------------------------------------------------------------------------------------------------------------------------------------------------------------------------------------------------------------|------------------------------|-----------------------------------------------|----------------------------|------------------------------------------------------------------------------------------------------------------------------------------------------------------------------------------------------------|----------------------------------------------------------------------------------------------------------------------------------------------------------------------------------------------------------------------------------------------------------------------------------------------------------------------------------------------------------------------------------------------------------------------------------------------|---------------------------------|---------------------------------------------------------------------------------------------------------------------------------------------------------------------------------------------------------------------------------------------------|
|                                                                                |               |                                                                                                                                                                                                                                                                                                                                                                                                                                               |                              |                                               |                            | of obstetric anaesthesia care, were generated by expert consensus and incorporate evidence-based recommendations.                                                                                          | improve the standards nationally, and to provide a broad surrogate quality metric of institutions providing obstetric anaesthesia care.                                                                                                                                                                                                                                                                                                      |                                 | <b>Equipment</b> <ul style="list-style-type: none"> <li>Includes access to blood transfusion equipment and supplies, access to resuscitation and intubation equipment and supplies</li> </ul>                                                     |
| Casanueva et al <sup>5</sup><br>& Tritos <sup>6</sup>                          | International | To describe the criteria for developing Pituitary Tumors CoE                                                                                                                                                                                                                                                                                                                                                                                  | Other <sup>#</sup> & Website | Pituitary Tumor Centers of Excellence (PTCOE) | Criteria disseminated 2017 | Expert working group drafted framework. The draft was modified and approved by the Board of Directors of the Pituitary Society. The document was presented to international groups, modified and endorsed. | <ul style="list-style-type: none"> <li>Provide the best multidisciplinary care for patients with pituitary tumours and related pathologies.</li> <li>Advance pituitary science</li> <li>Provide adequate patient education and community outreach.</li> <li>Act as a training centre for residents in the treatment of pituitary</li> <li>Pathologies</li> <li>Advise health administrators and authorities on specific problems.</li> </ul> | Patients with pituitary tumours | <b>Personnel</b> <ul style="list-style-type: none"> <li>Medical specialists</li> <li>Multidisciplinary supports</li> <li>Basic requirements for surgical training and endocrinologist training listed.</li> </ul>                                 |
| Chang et al <sup>7</sup> & Lymphatic Education & Research Network <sup>8</sup> | USA           | To describe the steps taken to establish standards for Centres of Excellence for Lymphatic Disease<br>Described 5 categories of Centres of Excellence: <ul style="list-style-type: none"> <li>Comprehensive Centre of Excellence</li> <li>Network of Excellence</li> <li>Referral Network of Excellence</li> <li>Lymphatic Disease Surgery Centre of Excellence</li> <li>Lymphatic Disease Conservative Care Centre of Excellence.</li> </ul> | Research article*, website   | Lymphatic Education and research network CoE  | Criteria published 2021    | Lymphatic Education and Research Network initiated a Centres of Excellence program to designate institutions that provide services for lymphatic disease patients                                          | <ul style="list-style-type: none"> <li>Provide multidisciplinary clinical care</li> <li>Provide professional and lay education</li> <li>Involvement in clinical research</li> </ul> Work with local and international CoCEs to continually improve the lives of people with LD and their families.                                                                                                                                           | Lymphatic disease               | <b>Personnel</b> <ul style="list-style-type: none"> <li>Multi-disciplinary input</li> <li>Suggested expertise requirements listed in detail</li> </ul> <b>Resources</b> <ul style="list-style-type: none"> <li>Assessment tools listed</li> </ul> |

CoE – Centre of Excellence

\*Research article in peer reviewed journal

^Other in peer reviewed journal

^Case report in peer reviewed journal

|                                     |      |                                                                                                                                                                                                 |                    |                                                  |                                                              |                                                                                                                                                                                                            |                                                                                                                                                                                    |                                      |                                                                                                                                                                                                                                                                                                                                 |
|-------------------------------------|------|-------------------------------------------------------------------------------------------------------------------------------------------------------------------------------------------------|--------------------|--------------------------------------------------|--------------------------------------------------------------|------------------------------------------------------------------------------------------------------------------------------------------------------------------------------------------------------------|------------------------------------------------------------------------------------------------------------------------------------------------------------------------------------|--------------------------------------|---------------------------------------------------------------------------------------------------------------------------------------------------------------------------------------------------------------------------------------------------------------------------------------------------------------------------------|
| Choque-Velasquez et al <sup>9</sup> | Peru | To describe the development of Neurosurgical Centre of Excellence in Peru                                                                                                                       | Research article*  | Specialized Neurosurgical Centre of Excellence   | 2016                                                         | Not specified what process used                                                                                                                                                                            | To improve the treatment of neurosurgical diseases in the region, thus optimising their outcomes and decreasing transfers to the neurosurgical departments in the capital district | Specialty neurosurgical centre, Peru | <b>Personnel</b> <ul style="list-style-type: none"> <li>• Staff training by neurosurgeons and nurses from Finland</li> </ul> <b>Equipment</b> <ul style="list-style-type: none"> <li>• Equipment provided/repared</li> </ul> <b>Other</b> <ul style="list-style-type: none"> <li>• Neurosurgical protocols developed</li> </ul> |
| Coon et al <sup>10</sup>            | USA  | Introduced key aspects of coordinated care for patients with MSA and their caregivers, discuss various outcome measures, and share experiences from two centers with multidisciplinary clinics. | Other <sup>#</sup> | Multiple System Atrophy CoE                      | Multiple Centres discussed. Established between 2015 - 2019. | Created by authors but process not described                                                                                                                                                               | Not reported                                                                                                                                                                       | Multiple System Atrophy              | <b>Personnel</b> <ul style="list-style-type: none"> <li>• Multi-disciplinary team</li> </ul>                                                                                                                                                                                                                                    |
| Creehan et al <sup>11</sup>         | USA  | Describe the development of a framework for Centres of Pressure Ulcer Prevention Excellence                                                                                                     | Research article*  | Centers for Pressure Ulcer Prevention Excellence | The process developed in 2014                                | Framework developed using Donabedian model. Systematic literature reviews, analysis of exemplars, and nominal group process techniques were used to create the framework, based on 4 Magnet Model domains. | Inspirational centre - to develop a framework. Aim to achieve and sustain reductions in avoidable hospital-acquired pressure ulcers                                                | Pressure ulcer                       | <b>Personnel</b> <ul style="list-style-type: none"> <li>• Frontline staff engagement and hospital</li> <li>• Administrator</li> <li>• Leadership</li> </ul>                                                                                                                                                                     |
| Daming et al <sup>12</sup>          | USA  | A guide for creating a center of excellence for prenatal care for women with cardiovascular disease.                                                                                            | Other <sup>#</sup> | Maternal Cardiac CoE                             | 2014                                                         | Developed a 3 staged framework (vision-> design and development -> implement, monitor and review).                                                                                                         | To manage pregnant women consistently and systematically with heart disease.                                                                                                       | Maternal cardiac health              | <b>Personnel</b> <ul style="list-style-type: none"> <li>• Program coordinator</li> <li>• Multi-disciplinary team (recommendation provided for speciality)</li> </ul> <b>Infrastructure:</b> <ul style="list-style-type: none"> <li>• Dedicated outpatient clinic</li> </ul>                                                     |

CoE – Centre of Excellence

\*Research article in peer reviewed journal

<sup>#</sup>Other in peer reviewed journal<sup>^</sup>Case report in peer reviewed journal

|                                   |              |                                                                                                                         |                   |                                                                                           |              |                                                                                                                                                                         |                                                                                                                                                                                                                                                                                                                                                                 |                                |                                                                                                                                                                                                                                                                                                                                                                |
|-----------------------------------|--------------|-------------------------------------------------------------------------------------------------------------------------|-------------------|-------------------------------------------------------------------------------------------|--------------|-------------------------------------------------------------------------------------------------------------------------------------------------------------------------|-----------------------------------------------------------------------------------------------------------------------------------------------------------------------------------------------------------------------------------------------------------------------------------------------------------------------------------------------------------------|--------------------------------|----------------------------------------------------------------------------------------------------------------------------------------------------------------------------------------------------------------------------------------------------------------------------------------------------------------------------------------------------------------|
| Deshmukh et al <sup>13</sup>      | India        | To evaluate the impact of the Centre of Excellence at Vidya Shikshan Prasarak Mandal Dental College and Research Centre | Research article* | Centre of Excellence at Vidya Shikshan Prasarak Mandal Dental College and Research Centre | 2016         | The present CoE model was planned and executed with consensus building for 12 months using several methods to involve stakeholder groups (staff, students and patients) | <ul style="list-style-type: none"> <li>To provide comprehensive oral healthcare for economically disadvantaged groups in rural India.</li> <li>To foster organisational development through an integrated approach.</li> <li>To stand out as a pioneer in Central Indian region in the fields of maxillofacial rehabilitation and oral implantology.</li> </ul> | Oral healthcare                | <b>Personnel</b> <ul style="list-style-type: none"> <li>Academic faculty, consultants and post-graduate students</li> </ul>                                                                                                                                                                                                                                    |
| Dietz et al <sup>14</sup>         | USA          | Summary of best practices for the prevention and treatment of PJI within the context of a CoE.                          | Case report^      | Centers of Excellence in Addressing Periprosthetic Joint Infection                        | Not reported | Creating a basis for framework within the literature, based on work on musculoskeletal infection symposium                                                              | Centers of Excellence provide better overall outcomes and lower financial, physical, and emotional costs to the patient, thus providing a greater value by decreasing variability in treatment pathways and incorporating best practices based on evidence.                                                                                                     | Periprosthetic joint infection | <b>Personnel</b> <ul style="list-style-type: none"> <li>Multi-disciplinary teams</li> </ul> <b>Equipment</b> <ul style="list-style-type: none"> <li>Electronic medical records</li> </ul> <b>Others</b> <ul style="list-style-type: none"> <li>Protocols for pre-operative screening and evaluation</li> <li>Risk reduction protocols and processes</li> </ul> |
| Distiller and Brown <sup>15</sup> | South Africa | Not reported                                                                                                            | Book Chapter      | Centres for Diabetes Excellence                                                           | 1994         | Not reported                                                                                                                                                            | To improve diabetes management and provide “one-stop shop” for patients. With all services in one place, and a well-managed appointment system, patients experienced minimal waiting and optimal consultation times.                                                                                                                                            | Diabetes                       | <b>Personnel</b> <ul style="list-style-type: none"> <li>Trained medical staff (specialists, GPs or physicians)</li> </ul> <b>Other</b> <ul style="list-style-type: none"> <li>every centre must provide a direct 24-h emergency telephone number (“Hotline”)</li> </ul>                                                                                        |
| Draznin et al <sup>16</sup>       | USA          | Proposing a framework to guide advancement for clinical CoE                                                             | Other#            | Diabetes Center of Excellence                                                             | Not reported | 6 domains or pillars to serve as guiding principles                                                                                                                     | To improve population health, patient care experience (including quality and satisfaction) and reducing healthcare costs. Diagnosis and management of diabetes.                                                                                                                                                                                                 | Diabetes                       | <b>Personnel</b> <ul style="list-style-type: none"> <li>Adequate in terms of number, skills, experience</li> <li>Multi-disciplinary professional teams guided by clinician diabetologists experienced in managing complex, high-risk</li> </ul>                                                                                                                |

CoE – Centre of Excellence

\*Research article in peer reviewed journal

#Other in peer reviewed journal

^Case report in peer reviewed journal

|                                      |                            |                                                                                                  |                          |                                                                            |              |                                                                                                                                                                   |                                                                                                                                              |                                               |                                                                                                                                                                                                                                                                                                                                                                  |
|--------------------------------------|----------------------------|--------------------------------------------------------------------------------------------------|--------------------------|----------------------------------------------------------------------------|--------------|-------------------------------------------------------------------------------------------------------------------------------------------------------------------|----------------------------------------------------------------------------------------------------------------------------------------------|-----------------------------------------------|------------------------------------------------------------------------------------------------------------------------------------------------------------------------------------------------------------------------------------------------------------------------------------------------------------------------------------------------------------------|
|                                      |                            |                                                                                                  |                          |                                                                            |              |                                                                                                                                                                   |                                                                                                                                              |                                               | <p>individuals</p> <p><b>Infrastructure</b></p> <ul style="list-style-type: none"> <li>• appropriate to qualify as a centre and technologies</li> </ul>                                                                                                                                                                                                          |
| El-Eshmawi et al <sup>17</sup>       | USA                        | To define the structure of a mitral center of excellence and to review current clinical outcomes | Other <sup>#</sup>       | Mitral Valve Center of Excellence                                          | Not Reported | Description of functioning of self-nominated Centre of Excellence                                                                                                 | Provides a structure for a multidisciplinary heart team to provide state of the art care for patients with degenerative mitral valve disease | Mitral valve disease                          | <p><b>Personnel</b></p> <ul style="list-style-type: none"> <li>• Crucial - surgeons trained in mitral valve repair; anaesthesia team, intensive care team, interventional cardiologist</li> </ul> <p><b>Infrastructure</b></p> <ul style="list-style-type: none"> <li>• Mitral valve clinic; access to advanced cardiac imaging; data monitoring team</li> </ul> |
| Elrod and Fortenberry <sup>18</sup>  | USA                        | To guide healthcare establishments to replicate noted processes to realize their own CoE         | Other <sup>#</sup>       | Willis-Knighton Health System CoE (has 11 CoE in different clinical areas) | 1980's       | Based on information and insights gleaned from 1 healthcare provider's (Willis-Knighton Health System) experience assembling and operating Centers of Excellence. | To deliver innovative, high-quality healthcare that would attract increasing number of patents                                               | 11 clinical areas by this healthcare provider | <p><b>Personnel</b></p> <ul style="list-style-type: none"> <li>• Skilled and experienced personnel</li> </ul> <p><b>Infrastructure</b></p> <ul style="list-style-type: none"> <li>• Appropriate accommodation necessary to deliver continuum of care</li> </ul>                                                                                                  |
| Ferguson and Froehlich <sup>19</sup> | USA                        | Describe the development of the program, its guiding principles, challenges and early results    | Case report <sup>^</sup> | The Total Joint Centre                                                     | 2010         | Not reported. Intuitive quality improvement process with assistance from external consultant                                                                      | To provide state-of-the-art, high quality, patient-centric, efficient healthcare                                                             | Joint replacements                            | <p><b>Personnel</b></p> <ul style="list-style-type: none"> <li>• Multi-disciplinary team</li> <li>• Patient navigators employed</li> </ul>                                                                                                                                                                                                                       |
| Frara et al <sup>20</sup>            | Authorship team from Spain | Not reported. Discussion paper                                                                   | Case report <sup>^</sup> | Pituitary tumors centers of excellence                                     | Not reported | Adapted from Elrod and Fortenberry                                                                                                                                | To provide a high-level care for pituitary patients, to advance pituitary science.                                                           | Pituitary tumors                              | <p><b>Personnel</b></p> <ul style="list-style-type: none"> <li>• Specialist medical staffing and nursing</li> </ul> <p><b>Infrastructure</b></p> <ul style="list-style-type: none"> <li>• Physical place availability</li> </ul>                                                                                                                                 |

CoE – Centre of Excellence

\*Research article in peer reviewed journal

^Other in peer reviewed journal

^Case report in peer reviewed journal

|                                       |      |                                                                                                                                                                                                                                                                                                                                                                                                                                                                            |                               |                                                                                  |              |                                                                                                   |                                                                                 |                    |                                                                                                                                 |
|---------------------------------------|------|----------------------------------------------------------------------------------------------------------------------------------------------------------------------------------------------------------------------------------------------------------------------------------------------------------------------------------------------------------------------------------------------------------------------------------------------------------------------------|-------------------------------|----------------------------------------------------------------------------------|--------------|---------------------------------------------------------------------------------------------------|---------------------------------------------------------------------------------|--------------------|---------------------------------------------------------------------------------------------------------------------------------|
| Geetha et al <sup>21</sup>            | USA  | Apply the definition of clinical excellence to nephrology                                                                                                                                                                                                                                                                                                                                                                                                                  | Other <sup>#</sup>            | Miller-Coulson Academy of Clinical Excellence                                    | 2015         | Adapted clinical excellence framework from Christmas                                              | Not reported                                                                    | Nephrology         | Not reported                                                                                                                    |
| Haider et al <sup>22</sup>            | LMIC | <ul style="list-style-type: none"> <li>To explore the role of international urologic organisations in developing CoE in patient care, training and dissemination of knowledge.</li> <li>To explore strategies used to improve the standard of care and outcomes of urologic conditions in LMIC.</li> <li>To provide a roadmap on how similar international surgical organizations can contribute to developing CoE in LMIC through health system strengthening.</li> </ul> | Case report <sup>^</sup>      | Not reported                                                                     | Not reported | Used Elrod and Fortenberry                                                                        | To contribute to health system strengthening through international partnerships | Urology Surgery    | <b>Personnel</b> <ul style="list-style-type: none"> <li>Staff with depth and breadth of knowledge and qualifications</li> </ul> |
| King, Jamieson and Berg <sup>23</sup> | USA  | To use the example of transplant programs (with extensive national-level data) as examples of the strategic planning required to accomplish comprehensive. Interdisciplinary care affording the best possible outcomes, and rightfully claim to serve as centres of Excellence.                                                                                                                                                                                            | Other <sup>#</sup>            | Presents 9 Centres of Excellence designations within solid-organ transplantation | Not reported | Elrod and Fortenberry                                                                             | Providing best outcomes possible to people undergoing organ transplantation     | Hepatology         | Not reported                                                                                                                    |
| Kullar et al <sup>24</sup>            | USA  | <ul style="list-style-type: none"> <li>To describe the process and purpose of designating institutions as Antimicrobial Stewardship Centres of Excellence CoEs.</li> <li>To provide awareness to clinicians on opportunities</li> </ul>                                                                                                                                                                                                                                    | Research article <sup>*</sup> | Antimicrobial Stewardship Centres of Excellence (program)                        | 2017         | Built on core elements of Centers for Disease Control and Prevention. Added aspects of meaningful | Effectively implement of antimicrobial stewardship programs                     | Infectious Disease | <b>Personnel</b> <ul style="list-style-type: none"> <li>Clinical expertise</li> </ul>                                           |

CoE – Centre of Excellence

<sup>\*</sup>Research article in peer reviewed journal<sup>#</sup>Other in peer reviewed journal<sup>^</sup>Case report in peer reviewed journal

|                                                                                  |                             |                                                                                                                                                                                  |                                              |                                                              |              |                                                                                                        |                                                                                                                                                                                                                                                           |                                      |                                                                                                                                                                                                                                                                                                                                                                                                        |
|----------------------------------------------------------------------------------|-----------------------------|----------------------------------------------------------------------------------------------------------------------------------------------------------------------------------|----------------------------------------------|--------------------------------------------------------------|--------------|--------------------------------------------------------------------------------------------------------|-----------------------------------------------------------------------------------------------------------------------------------------------------------------------------------------------------------------------------------------------------------|--------------------------------------|--------------------------------------------------------------------------------------------------------------------------------------------------------------------------------------------------------------------------------------------------------------------------------------------------------------------------------------------------------------------------------------------------------|
|                                                                                  |                             | available through Infectious Diseases Society of America with this CoE designation                                                                                               |                                              |                                                              |              | differentiation by workgroup of infectious diseases physicians and pharmacists.                        |                                                                                                                                                                                                                                                           |                                      |                                                                                                                                                                                                                                                                                                                                                                                                        |
| Lancellotti, Dulgheru and Sakalihan <sup>25</sup> & Chambers et al <sup>26</sup> | Multiple European countries | Chambers: to discuss Standards for mitral and aortic valve multidisciplinary team practice within a 'Heart Valve Center of Excellence'.                                          | Other <sup>#</sup> & Research article*       | Heart Valve Centre of Excellence                             | Not reported | Not reported                                                                                           | To perform durable mitral valve repair at close to zero risk in patients with asymptomatic severe mitral regurgitation caused by prolapse. The intention was that invasive valve interventions should not occur outside Heart Valve Centres of Excellence | Heart Valve Surgery                  | <p><b>Personnel</b></p> <ul style="list-style-type: none"> <li>Multi-disciplinary team (medical and nursing) proficient in diagnosing and treating all cardiac valve syndromes and disorders</li> </ul> <p><b>Infrastructure</b></p> <ul style="list-style-type: none"> <li>Facilities to treat and refer patients for valvular surgery/intervention.</li> <li>Access to expert imaging</li> </ul>     |
| Li et al <sup>27</sup>                                                           | USA                         | To evaluate the current status of defining and using CoE designation                                                                                                             | Research article*                            | Not reported                                                 | Not reported | Not reported                                                                                           | Not reported                                                                                                                                                                                                                                              | Multiple area                        | Not reported                                                                                                                                                                                                                                                                                                                                                                                           |
| Marinoff and Heiberger <sup>28</sup>                                             | China                       | To share accomplishments and limitations from creating a Centre of Excellence in Low Vision rehabilitation in China                                                              | Case report <sup>^</sup>                     | Center of Excellence in Low Vision and Vision Rehabilitation | 2010         | Not reported                                                                                           | Treatment of people with low vision                                                                                                                                                                                                                       | Low vision and vision rehabilitation | <p><b>Personnel</b></p> <ul style="list-style-type: none"> <li>Trained doctors and nurses</li> </ul> <p><b>Infrastructure</b></p> <ul style="list-style-type: none"> <li>Occupies 6,240 square feet and is equipped with four low vision examination rooms, a special testing room, an assistive technology room, a dispensing area, and a classroom, access to multiple low vision devices</li> </ul> |
| Martin et al <sup>29</sup>                                                       | Various countries           | Utilize available literature to better characterize the features of a spine COE at a tertiary care center and determine the impact of CoEs on patient satisfaction and outcomes. | Systematic Review & Case report <sup>^</sup> | Spine CoE                                                    | 2021         | The COE's (Midwest academic tertiary care) mission entails three primary emphases: value, quality, and | Standardisation of protocols for the works up of suspected spinal cord compression across the regional hospital system to improve time to diagnosis, transport and intervention.                                                                          | Spine                                | Not reported                                                                                                                                                                                                                                                                                                                                                                                           |

CoE – Centre of Excellence

\*Research article in peer reviewed journal

<sup>#</sup>Other in peer reviewed journal<sup>^</sup>Case report in peer reviewed journal

|                                |                             |                                                                                                                                                                                                                                                                                           |                    |                                |              |                                                                                              |                                                                                                                                        |                           |                                                                                                                                                                                                                                                                                                                                                                                                                                                                                                                                                                                |
|--------------------------------|-----------------------------|-------------------------------------------------------------------------------------------------------------------------------------------------------------------------------------------------------------------------------------------------------------------------------------------|--------------------|--------------------------------|--------------|----------------------------------------------------------------------------------------------|----------------------------------------------------------------------------------------------------------------------------------------|---------------------------|--------------------------------------------------------------------------------------------------------------------------------------------------------------------------------------------------------------------------------------------------------------------------------------------------------------------------------------------------------------------------------------------------------------------------------------------------------------------------------------------------------------------------------------------------------------------------------|
|                                |                             |                                                                                                                                                                                                                                                                                           |                    |                                |              | accountability.                                                                              |                                                                                                                                        |                           |                                                                                                                                                                                                                                                                                                                                                                                                                                                                                                                                                                                |
| McLaughlin et al <sup>30</sup> | USA                         | Review the literature supporting the establishment of pituitary CoEs, suggest criteria for COE recognition, consider the development of standards of care, and discuss potential pitfalls.                                                                                                | Other <sup>#</sup> | Pituitary Centre of excellence | NA           | Not reported for pituitary tumour, however provided examples of other models e.g., bariatric | Treatment of pituitary tumour and described primary missions and criteria for verification                                             | Pituitary                 | <p><b>Personnel</b></p> <ul style="list-style-type: none"> <li>• Multi-disciplinary approach related to pituitary tumours and hormonal disorders.</li> <li>• At least 1 neurosurgeon with transsphenoidal surgical experience</li> <li>• Training for team</li> </ul> <p><b>Equipment</b></p> <ul style="list-style-type: none"> <li>• Equipment and instrumentation for endonasal cranial base surgery including endoscopic equipment</li> </ul> <p><b>Others</b></p> <ul style="list-style-type: none"> <li>• Clinical pathways and standard operating procedures</li> </ul> |
| Nakov et al <sup>31</sup>      | Bulgaria                    | Focus on the importance of performing the most appropriate testing strategies for ATTR amyloidosis and establishing a CoE for this rare disease. Highlights experience in establishing a CoE in Sofia, Bulgaria and define the fundamental steps needed to successfully launch a program. | Other <sup>#</sup> | CoE for ATTR amyloidosis       | 2016         | Not reported                                                                                 | Treatment for Amyloidosis                                                                                                              | Transthyretin Amyloidosis | <p><b>Personnel</b></p> <ul style="list-style-type: none"> <li>• Dedicated team of experts specialized in the range of medical fields required to diagnose the patients effectively and education/training for staff</li> </ul>                                                                                                                                                                                                                                                                                                                                                |
| Piccini et al <sup>32</sup>    | Not specifically identified | HRS hopes to accelerate this evolution by reviewing the rationale for AF CoEs, the available evidence for integrated and multidisciplinary care, and future challenges and opportunities. The document also defines the key priorities to be used as a guide for HRS                      | Other <sup>#</sup> | Atrial Fibrillation CoE        | Not reported | Fundamentals of team-based integrated care models in atrial fibrillation                     | To improve outcomes by providing a better patient experience and delivering high-quality, guideline-recommended, state of the art care | Atrial Fibrillation       | <p><b>Personnel</b></p> <ul style="list-style-type: none"> <li>• Multi-disciplinary team</li> </ul> <p><b>Infrastructure</b></p> <ul style="list-style-type: none"> <li>• Dedicated lab with fluoroscopy</li> <li>• Electrophysiology recording system</li> <li>• Emergency equipment</li> </ul> <p><b>Others</b></p> <ul style="list-style-type: none"> <li>• Complication standard operating</li> </ul>                                                                                                                                                                      |

CoE – Centre of Excellence

\*Research article in peer reviewed journal

^Other in peer reviewed journal

^Case report in peer reviewed journal



|                                      |               |                                                                                                                                                                                                                                                                                                                                                                      |                                        |                                                    |              |                                                                                                                                                                                               |                                                                                                                                                                                                                                                                                                                                                                                                               |                      |                                                                                                                                                                                                                                                                                                                                                                                                                                                            |
|--------------------------------------|---------------|----------------------------------------------------------------------------------------------------------------------------------------------------------------------------------------------------------------------------------------------------------------------------------------------------------------------------------------------------------------------|----------------------------------------|----------------------------------------------------|--------------|-----------------------------------------------------------------------------------------------------------------------------------------------------------------------------------------------|---------------------------------------------------------------------------------------------------------------------------------------------------------------------------------------------------------------------------------------------------------------------------------------------------------------------------------------------------------------------------------------------------------------|----------------------|------------------------------------------------------------------------------------------------------------------------------------------------------------------------------------------------------------------------------------------------------------------------------------------------------------------------------------------------------------------------------------------------------------------------------------------------------------|
|                                      |               | and its diverse stakeholders to build consensus on defining the core components of an AF CoE.                                                                                                                                                                                                                                                                        |                                        |                                                    |              |                                                                                                                                                                                               |                                                                                                                                                                                                                                                                                                                                                                                                               |                      | procedure                                                                                                                                                                                                                                                                                                                                                                                                                                                  |
| Pronovost et al <sup>33</sup>        | USA           | Defines explicit criteria for provider-based CoEs and how to apply them within a healthcare organization                                                                                                                                                                                                                                                             | Case report <sup>^</sup>               | General description of CoE                         | Not reported | Reported used a framework based on University Hospital, USA and listed the criteria used to establish CoE as a framework.                                                                     | Have access to multi-D team and seek to improve patient experience and outcomes and reduce costs                                                                                                                                                                                                                                                                                                              | NA                   | Not reported specifically. Used examples from other CoE                                                                                                                                                                                                                                                                                                                                                                                                    |
| Safer Care Victoria <sup>34</sup>    | Australia     | Discuss approaches to engaging clinicians and consumers to improve the quality and safety of health care in Vitoria. Spells out the purpose, role and structure of the CoCE.                                                                                                                                                                                         | Website – grey literature              | Safer Care Victoria Centres of Clinical Excellence | 2021         | Aligns with Safe Care Victoria Strategic Plan 2020-2023.                                                                                                                                      | Contribute to the key strategic domains of leadership, partnership and planning, monitoring and improvement with the aim of improving healthcare across Victoria, so it is safe, more effective and person-centred.                                                                                                                                                                                           | Multiple setting     | Not reported                                                                                                                                                                                                                                                                                                                                                                                                                                               |
| Sandhu et al <sup>35</sup>           | USA           | To gain a better understanding from key stakeholder groups on current practices needs and potential barriers to implementing optimal integrated AF care.                                                                                                                                                                                                             | Other <sup>#</sup>                     | Atrial Fibrillation CoE                            | 2022         | AF CoE task force provides recommendations on defining, developing, implementing and evaluating an AF CoE                                                                                     | To standardise the care of AF patients based on guideline directed care to achieve best outcomes.                                                                                                                                                                                                                                                                                                             | Atrial Fibrillation  | <b>Personnel</b> <ul style="list-style-type: none"> <li>Identified the need for multi-disciplinary team</li> </ul>                                                                                                                                                                                                                                                                                                                                         |
| Santos-Moreno et al <sup>36-38</sup> | South America | <ul style="list-style-type: none"> <li>To define the minimum standard of care.</li> <li>To describe the history and current context of the CoE in comprehensive care in patients with RA with suggestions on how to create CoE in RA</li> <li>Proposed a systematic and progressive methodology that will help all the institutions to develop successful</li> </ul> | Research article* & Other <sup>#</sup> | Centre of Excellence in Rheumatoid Arthritis       | Not stated   | <p>Created own framework and integrated healthcare models and endorsed by REAL-PANLAR</p> <p>Based on 3 pillars - the volume of patients with a specific condition or entity - continuous</p> | The ultimate goal of the CoE is to define a model of comprehensive care that meets the needs of the region in order to improve the accessibility, quality, and timeliness of care, and access to appropriate diagnosis and treatment. This is to facilitate access to better quality treatment, achieve disease remission, improve their quality of life and reduce long-term disability risk to RA patients. | Rheumatoid Arthritis | <p>Three CoE Modes were presented and each model (standard CoE, Optimal CoE, Model CoE) had different requirements of staff, equipment and infrastructure</p> <p><b>Personnel (at minimum)</b></p> <ul style="list-style-type: none"> <li>Multi-disciplinary team led by rheumatologist</li> </ul> <p><b>Infrastructure</b></p> <ul style="list-style-type: none"> <li>Access to radiology</li> <li>Access to pathology</li> </ul> <p><b>Equipment</b></p> |

CoE – Centre of Excellence

\*Research article in peer reviewed journal

^Other in peer reviewed journal

#Case report in peer reviewed journal

|                                                |     |                                                                                                                                                                                                                                                                                                                                                                             |                          |                                        |                                                                             |                                                                                                                                                                                                                                                                                                                                                                                                                           |                                                                                  |                           |                                                                                                                                                                                                                                                                                                                                                            |
|------------------------------------------------|-----|-----------------------------------------------------------------------------------------------------------------------------------------------------------------------------------------------------------------------------------------------------------------------------------------------------------------------------------------------------------------------------|--------------------------|----------------------------------------|-----------------------------------------------------------------------------|---------------------------------------------------------------------------------------------------------------------------------------------------------------------------------------------------------------------------------------------------------------------------------------------------------------------------------------------------------------------------------------------------------------------------|----------------------------------------------------------------------------------|---------------------------|------------------------------------------------------------------------------------------------------------------------------------------------------------------------------------------------------------------------------------------------------------------------------------------------------------------------------------------------------------|
|                                                |     | models without faltering in the process                                                                                                                                                                                                                                                                                                                                     |                          |                                        |                                                                             | improvement - the quality of healthcare                                                                                                                                                                                                                                                                                                                                                                                   |                                                                                  |                           | <ul style="list-style-type: none"> <li>Standardised tools</li> </ul>                                                                                                                                                                                                                                                                                       |
| Sheha and Iyer <sup>39</sup>                   | USA | General description of CoE and applying general principles of healthcare CoE to spine surgery                                                                                                                                                                                                                                                                               | Other <sup>#</sup>       | Spine CoE                              | Multiple centres that was previously established was discussed in the study | Not reported                                                                                                                                                                                                                                                                                                                                                                                                              | An opportunity to accurately evaluate the true value of outpatient spine surgery | Ambulatory spinal surgery | <b>Personnel</b> <ul style="list-style-type: none"> <li>Multi-disciplinary team</li> <li>Education</li> </ul>                                                                                                                                                                                                                                              |
| Shikora, Delegge and Van Way III <sup>40</sup> | USA | Describes the creation, implementation, and benefits of the BSCoE (Bariatric Surgery COE) and the benefits of creating an NSCOE (Nutritional Support CoE). Description of the CoE in Bariatric Surgery and how this can be adapted to Nutritional Support. The report contains description of resources, how it was created the certification process and benefits of BSCoE | Case report <sup>^</sup> | Nutrition Support Center of Excellence | 2003 - creation of the Surgical Review Corporation (SRC).                   | Consideration for adaption of BSCoE to NSCoE<br><br>The SRC <ul style="list-style-type: none"> <li>Formulate and establish guidelines and criteria for assessing bariatric surgical practices.</li> <li>Evaluate and investigate applicants to ensure that they met the established standards to become a BSCOE.</li> <li>Creating a national bariatric surgical database to collect, analyse, and disseminate</li> </ul> | Not reported                                                                     | Nutritional Support       | Specified BSCoE and how this can be adapted to NSCoE<br><br><b>Personnel</b> <ul style="list-style-type: none"> <li>Surgeons specific criteria for BSCoE</li> </ul> <b>Infrastructure</b> <ul style="list-style-type: none"> <li>Specific to BSCoE</li> </ul> <b>Equipment</b> <ul style="list-style-type: none"> <li>Not specifically outlined</li> </ul> |

CoE – Centre of Excellence

<sup>#</sup>Research article in peer reviewed journal<sup>^</sup>Other in peer reviewed journal<sup>^</sup>Case report in peer reviewed journal

|                             |        |                                                                                                                                                                                                         |                    |                                          |              | data collected from the BSCOE's |                                                                                                                                                                                                      |                                      |                                                                                                                                                                                                                                                                                                                                                                                                                                                                                |
|-----------------------------|--------|---------------------------------------------------------------------------------------------------------------------------------------------------------------------------------------------------------|--------------------|------------------------------------------|--------------|---------------------------------|------------------------------------------------------------------------------------------------------------------------------------------------------------------------------------------------------|--------------------------------------|--------------------------------------------------------------------------------------------------------------------------------------------------------------------------------------------------------------------------------------------------------------------------------------------------------------------------------------------------------------------------------------------------------------------------------------------------------------------------------|
| Shommu et al <sup>41</sup>  | Canada | To develop a multi-disciplinary consensus of nutrition care priorities for implementation in an IBD nutrition CoE                                                                                       | Research article*  | Inflammatory Bowel Disease Nutrition CoE | 2019         | Not reported                    | To provide excellent clinical care, conduct original research                                                                                                                                        | Inflammatory Bowel Disease           | Raised as a concern/barrier <ul style="list-style-type: none"> <li>Lack of infrastructure</li> <li>Lack of staffing</li> </ul>                                                                                                                                                                                                                                                                                                                                                 |
| Silver et al <sup>42</sup>  | USA    | To outline criteria for centers of excellence and suggested indications for referral in cases of suspected placenta accreta.                                                                            | Other <sup>#</sup> | Accreta CoE                              | Not reported | Not reported                    | Optimal management of patients with placenta accreta                                                                                                                                                 | Placenta Accreta Intensive care unit | <b>Personnel</b> <ul style="list-style-type: none"> <li>Multi-disciplinary team with specialised staff for placenta accreta</li> </ul> <b>Infrastructure</b> <ul style="list-style-type: none"> <li>Intensive Care unit and facilities</li> </ul>                                                                                                                                                                                                                              |
| Steiner et al <sup>43</sup> | USA    | To suggest criteria that the headache centres might be recognised as centres of excellence in the headache community. Set out recommendations for 10 suggested role and performance-defining standards. | Other <sup>#</sup> | Specialized headache centre              | Not reported | Not reported                    | Providing specialist care to patients with primary or secondary headache disorders that are difficult to diagnose or treat, refractory or rare, or for other reasons require specialist intervention | Headache                             | <b>Personnel</b> <ul style="list-style-type: none"> <li>Multi-disciplinary care</li> </ul>                                                                                                                                                                                                                                                                                                                                                                                     |
| Tapela et al <sup>44</sup>  | Rwanda | Report program level description of implementing Butaro Cancer CoE, its preliminary impact and challenges faced in order to share lessons and inform service delivery in similar setting                | Research article*  | Butaro Cancer CoE                        | 2012         | Not reported                    | To deliver accessible cancer services in a resource-constrained setting histology-based diagnosis, imaging, surgical, pall care and socioeconomic supports                                           | Cancer                               | Provided by Rwanda Ministry of Health. <b>Personnel</b> <ul style="list-style-type: none"> <li>Doctors and nurses received training</li> </ul> <b>Infrastructure</b> <ul style="list-style-type: none"> <li>To support surgical procedures and palliative care</li> </ul> <b>Equipment</b> <ul style="list-style-type: none"> <li>X-ray and ultrasounds imaging</li> </ul> <b>Others</b> <ul style="list-style-type: none"> <li>Treatment protocol</li> <li>Finance</li> </ul> |

CoE – Centre of Excellence

\*Research article in peer reviewed journal

<sup>#</sup>Other in peer reviewed journal<sup>^</sup>Case report in peer reviewed journal

|                            |     |                                                                                                      |                    |                                      |                               |                                                                                                                                                                                                      |                                                                                                                                                                                                                                                                                                                                                       |                                  |                                                                                                                                                                                                                                                                                                                                                                                                                                                                                                                                                                                                                                                                        |
|----------------------------|-----|------------------------------------------------------------------------------------------------------|--------------------|--------------------------------------|-------------------------------|------------------------------------------------------------------------------------------------------------------------------------------------------------------------------------------------------|-------------------------------------------------------------------------------------------------------------------------------------------------------------------------------------------------------------------------------------------------------------------------------------------------------------------------------------------------------|----------------------------------|------------------------------------------------------------------------------------------------------------------------------------------------------------------------------------------------------------------------------------------------------------------------------------------------------------------------------------------------------------------------------------------------------------------------------------------------------------------------------------------------------------------------------------------------------------------------------------------------------------------------------------------------------------------------|
|                            |     |                                                                                                      |                    |                                      |                               |                                                                                                                                                                                                      |                                                                                                                                                                                                                                                                                                                                                       |                                  | <ul style="list-style-type: none"> <li>Partnership with other services from USA</li> </ul>                                                                                                                                                                                                                                                                                                                                                                                                                                                                                                                                                                             |
| Thomas et al <sup>45</sup> | USA | Establishing Cardiometabolic CoE for secondary prevention in patients with T2D and CVD               | Other <sup>#</sup> | Cardiometabolic Center of Excellence | 2018                          | Not reported                                                                                                                                                                                         | To deliver patient-centred collaborative model of care focused on aggressive and comprehensive secondary cardiovascular risk reduction in patients with T2D and CVD                                                                                                                                                                                   | T2DM + CVD                       | <b>Personnel</b> <ul style="list-style-type: none"> <li>Nurse navigator</li> <li>Cardiometabolic Center Advisory Committee</li> <li>Training</li> </ul>                                                                                                                                                                                                                                                                                                                                                                                                                                                                                                                |
| Vivian et al <sup>46</sup> | USA | To outline the framework for a Pancreas CoE                                                          | Research article*  | Pancreas CoE                         | 2013                          | Outlined framework using 3 developmental domains. <ul style="list-style-type: none"> <li>Establishing the foundation</li> <li>Formalising the program</li> <li>Solidifying the CoE status</li> </ul> | To improve the care and outcomes of patients and families affected by pancreatic disease using a multidisciplinary team approach to deliver exceptional and compassionate care                                                                                                                                                                        | Management of pancreatic disease | <b>Personnel</b> <ul style="list-style-type: none"> <li>Management – leadership support</li> <li>Surgeons trained in robotic surgical approach</li> <li>Multi-disciplinary staff trained</li> <li>Specific – nurse navigator and dietician</li> </ul> <b>Infrastructure</b> <ul style="list-style-type: none"> <li>To establish and maintain robotic surgical approach</li> </ul> <b>Equipment</b> <ul style="list-style-type: none"> <li>Minimally invasive technology (robotic)</li> <li>Advanced endoscopic technology</li> <li>Clinical Information Systems - dashboards.</li> </ul> <b>Others</b> <ul style="list-style-type: none"> <li>Certification</li> </ul> |
| Williams <sup>47</sup>     | USA | To discuss the evolution of the concept of Centers of Excellence and the components of an HCM center | Book Chapter       | Hypertrophic Cardiomyopathy Centre   | 1971 for the first 15 centers | Adapted model from National Cancer Institute                                                                                                                                                         | Network of referral centres established for adult and paediatric HCM patients' regional centres encourage consistency of treatment algorithms and outcomes access to world-class clinical care within driving distance, as well as collaborative research between institutions. Also a resource and offer second opinions for providers and patients. | Hypertrophic Cardiomyopathy      | <b>Personnel</b> <ul style="list-style-type: none"> <li>Multi-disciplinary team that includes specialists in adult and paediatric cardiology, electrophysiology, interventional cardiology, cardiac surgery and genetic counselling, all with particular expertise in treating the patient with HCM.</li> </ul> <b>Equipment</b>                                                                                                                                                                                                                                                                                                                                       |

CoE – Centre of Excellence

\*Research article in peer reviewed journal

<sup>#</sup>Other in peer reviewed journal<sup>^</sup>Case report in peer reviewed journal

|                            |                    |                                                                                                                                                                                                   |                   |                                                |                              |                                    |                                                                                                        |                          |                                                                                                                                                                                                                                                                                                                                                              |
|----------------------------|--------------------|---------------------------------------------------------------------------------------------------------------------------------------------------------------------------------------------------|-------------------|------------------------------------------------|------------------------------|------------------------------------|--------------------------------------------------------------------------------------------------------|--------------------------|--------------------------------------------------------------------------------------------------------------------------------------------------------------------------------------------------------------------------------------------------------------------------------------------------------------------------------------------------------------|
|                            |                    |                                                                                                                                                                                                   |                   |                                                |                              |                                    |                                                                                                        |                          | <ul style="list-style-type: none"> <li>• Cardiac imaging (echocardiography and cardiac magnetic resonance imaging)</li> <li>• Electrophysiology</li> </ul>                                                                                                                                                                                                   |
| Wirth et al <sup>48</sup>  | Europe (Barcelona) | To develop the concept of the European Prostate Cancer Centers of Excellence with the specific aim to identifying European Centers characterised by high-quality care, research and education     | Research article* | European Prostate Cancer Centres of Excellence | Criteria agreed upon in 2019 | Created by authors                 | To enable high-quality management of prostate cancer in the fields of clinics, research, and education | Prostate Cancer          | Resources requirements are outlined in detail in the study and specific requirement<br><b>Personnel</b> <ul style="list-style-type: none"> <li>• Core team, associated services and multi-disciplinary approach</li> </ul>                                                                                                                                   |
| Wu et al <sup>49</sup>     | USA                | To evaluate <ul style="list-style-type: none"> <li>• Patient outcomes at nominated CoE</li> <li>• Whether the revamped designation criteria would result in improved patient outcomes.</li> </ul> | Research article* | Blue Distinction Plus Centres                  | 2016                         | Value framework                    | Not reported                                                                                           | Inpatient spinal surgery | Not reported                                                                                                                                                                                                                                                                                                                                                 |
| Yao and Zhou <sup>50</sup> | China              | To describe the impact of the introduction of a mentor-based CoE program                                                                                                                          | Research article* | Peritoneal Dialysis CoE                        | 2003                         | Created using mentor-mentee system | To become a best demonstrated practice unit                                                            | Peritoneal dialysis      | <b>Personnel</b> <ul style="list-style-type: none"> <li>• Physicians from mentor sites</li> </ul> <b>Other</b> <ul style="list-style-type: none"> <li>• Standardized teaching materials to deliver lectures, lead PD case discussions and ward rounds, suggest key performance indicators, and initiate a continuous quality improvement program.</li> </ul> |

CoE – Centre of Excellence

\*Research article in peer reviewed journal

^Other in peer reviewed journal

^Case report in peer reviewed journal

## REFERENCE

1. Bitzer J, Reisman Y and Lowenstein L. Center of excellence for sexual medicine. 2013, p. 2127-2128.
2. Burkett D, Haldeman C, Page PS, et al. Centers of Excellence and Payer-Defined Quality Assessment. *Quality Spine Care: Healthcare Systems, Quality Reporting, and Risk Adjustment* 2019; 355-367.
3. Campbell A, Restrepo C, Mackay D, et al. Scalable, sustainable cost-effective surgical care: a model for safety and quality in the developing world, part I: challenge and commitment. *Journal of Craniofacial Surgery* 2014; 25: 1674-1679.
4. Carvalho B and Mhyre JM. Centers of excellence for anesthesia care of obstetric patients. *LWW*, 2019, p. 844-846.
5. Casanueva FF, Barkan AL, Buchfelder M, et al. Criteria for the definition of Pituitary Tumor Centers of Excellence (PTCOE): a Pituitary Society statement. *Pituitary* 2017; 20: 489-498.
6. Tritos N. Pituitary Tumor Centers of Excellence, <https://csrf.net/wp-content/uploads/2019/11/Centers-of-Excellence.pdf> (2019, accessed May 2023).
7. Chang D, Dayan J, Fried P, et al. Establishing standards for centers of excellence for the diagnosis and treatment of lymphatic disease. *Lymphatic Research and Biology* 2021; 19: 4-10.
8. Lymphatic Education & Research Network. Centers of Excellence, <https://lymphaticnetwork.org/centers-of-excellence> (2023, accessed January 2023).
9. Choque-Velasquez J, Colasanti R, Baffigo-Torre V, et al. Developing the first highly specialized neurosurgical center of excellence in Trujillo, Peru: work in progress—results of the first four months. *World neurosurgery* 2017; 102: 334-339.
10. Coon EA, Golden EP, Bryarly M, et al. A call for multiple system atrophy centers of excellence. *Clinical Autonomic Research* 2022: 1-4.
11. Creehan S, Cuddigan J, Gonzales D, et al. The VCU Pressure Ulcer Summit—Developing Centers of Pressure Ulcer Prevention Excellence. *Journal of Wound, Ostomy and Continence Nursing* 2016; 43: 121-128.
12. Daming TN, Florio KL, Schmidt LM, et al. Creating a maternal cardiac center of excellence: a call to action. *The Journal of Maternal-Fetal & Neonatal Medicine* 2021; 34: 4153-4158.
13. Deshmukh A, Radke U, Deshpande S, et al. Building Centres of Excellence in Dental Institute to Foster Organisational Development-A Preliminary Report. *Journal of Clinical & Diagnostic Research* 2018; 12.
14. Dietz MJ, Springer BD, Barnes PD, et al. Best practices for centers of excellence in addressing periprosthetic joint infection. *JAAOS-Journal of the American Academy of Orthopaedic Surgeons* 2015; 23: S12-S17.
15. Distiller LA and Brown MA. Approaches to integrated diabetes care: A South African approach. *Integrated Diabetes Care*. Springer, 2017, pp.87-105.
16. Draznin B, Kahn PA, Wagner N, et al. Clinical diabetes centers of excellence: a model for future adult diabetes care. *The Journal of Clinical Endocrinology & Metabolism* 2018; 103: 809-812.
17. El-Eshmawi A, Castillo JG, Tang GH, et al. Developing a mitral valve center of excellence. *Current Opinion in Cardiology* 2018; 33: 155-161.
18. Elrod JK and Fortenberry JL. Centers of excellence in healthcare institutions: what they are and how to assemble them. *BMC health services research* 2017; 17: 15-24.
19. Ferguson GM and Froehlich JA. Establishing a center of excellence: the Total Joint Center at the Miriam Hospital. *Rhode Island Medical Journal* 2013; 96: 16.
20. Frara S, Rodriguez-Carnero G, Formenti AM, et al. Pituitary tumors centers of excellence. *Endocrinology and Metabolism Clinics* 2020; 49: 553-564.
21. Geetha D, Lee SK, Srivastava AJ, et al. Clinical excellence in nephrology: examples from the published literature. *BMC nephrology* 2015; 16: 1-7.
22. Haider MA, Burks FN, Cassell A, et al. The Role of Organizations like IVUmed in Developing Centers of Excellence. *Current Bladder Dysfunction Reports* 2020; 15: 352-361.
23. King LY, Jamieson IR and Berg CL. Centers of excellence in hepatology: making the case to insurers, large employers, and patients. *Clinical Gastroenterology and Hepatology* 2021; 19: 2464-2468.
24. Kullar R, Nagel J, Bleasdale SC, et al. Going for the gold: a description of the centers of excellence designation by the Infectious Diseases Society of America. *Clinical Infectious Diseases* 2019; 68: 1777-1782.
25. Lancellotti P, Dulgheru R and Sakalihan N. Centres of excellence in heart valve surgery: are there standards for best practice? : Archives of Disease in childhood, 2015, p. e000282.
26. Chambers J, Ray S, Prendergast B, et al. Standards for heart valve surgery in a 'Heart Valve Centre of Excellence'. *Open Heart* 2015; 2: e000216.
27. Li J, Burson RC, Clapp JT, et al. Centers of excellence: Are there standards? In: *Healthcare* 2020, p.100388. Elsevier.
28. Marinoff R and Heiberger MH. Lessons Learned from the Creation of a Center of Excellence in Low Vision and Vision Rehabilitation in Wenzhou, China. *Journal of Visual Impairment & Blindness* 2017; 111: 453-464.
29. Martin RC, Pettitt JC, Pan X, et al. Spine centers of excellence: a systematic review and single-institution description of a spine center of excellence. *Journal of Spine Surgery* 2022; 8: 44.
30. McLaughlin N, Laws ER, Oyesiku NM, et al. Pituitary centers of excellence. *Neurosurgery* 2012; 71: 916-926.

CoE – Centre of Excellence

\*Research article in peer reviewed journal

°Other in peer reviewed journal

^Case report in peer reviewed journal

31. Nakov R, Sarafov S, Gospodinova M, et al. Transthyretin amyloidosis: testing strategies and model for center of excellence support. *Clinica Chimica Acta* 2020; 509: 228-234.
32. Piccini JP, Allred J, Bunch TJ, et al. Rationale, considerations, and goals for atrial fibrillation centers of excellence: a Heart Rhythm Society perspective. *Heart Rhythm* 2020; 17: 1804-1832.
33. Pronovost PJ, Ata GJ, Carson B, et al. What Is a Center of Excellence? *Population Health Management* 2022; 25: 561-567.
34. Safer Care Victoria. *Centres of Clinical Excellence framework*. July 2021. Victoria.
35. Sandhu RK, Seiler A, Johnson CJ, et al. Heart Rhythm Society Atrial Fibrillation Centers of Excellence Study: A survey analysis of stakeholder practices, needs, and barriers. *Heart Rhythm* 2022; 19: 1039-1048.
36. Santos-Moreno P, Galarza-Maldonado C, Caballero-Urbe CV, et al. REAL-PANLAR Project for the implementation and accreditation of centers of excellence in rheumatoid arthritis throughout Latin America: a consensus position paper from REAL-PANLAR Group on improvement of rheumatoid arthritis care in Latin America Establishing Centers of Excellence. *Journal of Clinical Rheumatology* 2015; 21: 175.
37. Santos-Moreno P, Caballero-Urbe CV, Massardo ML, et al. Systematic and progressive implementation of the centers of excellence for rheumatoid arthritis: a methodological proposal. *Clinical Rheumatology* 2017; 36: 2855-2858.
38. Santos-Moreno P, Castañeda O, Garro B, et al. From the model of integral attention to the creation of centers of excellence in rheumatoid arthritis. *Clinical rheumatology* 2015; 34: 71-77.
39. Sheha ED and Iyer S. Spine centers of excellence: applications for the ambulatory care setting. *Journal of Spine Surgery* 2019; 5: S133.
40. Shikora SA, Delegge M and Van Way III CW. Creation of nutrition support centers of excellence: is it truly an excellent idea? *Journal of Parenteral and Enteral Nutrition* 2010; 34: 1065-1145.
41. Shommu NS, Taylor LM, Panaccione R, et al. Nutrition Center of Excellence (COE) in inflammatory bowel disease—a model and rationale for development. *Journal of the Canadian Association of Gastroenterology* 2019; 2: 63-70.
42. Silver RM, Fox KA, Barton JR, et al. Center of excellence for placenta accreta. *American journal of obstetrics and gynecology* 2015; 212: 561-568.
43. Steiner TJ, Göbel H, Jensen R, et al. Headache service quality: the role of specialized headache centres within structured headache services, and suggested standards and criteria as centres of excellence. *The Journal of Headache and Pain* 2019; 20: 1-9.
44. Tapela NM, Mpunga T, Hedt-Gauthier B, et al. Pursuing equity in cancer care: implementation, challenges and preliminary findings of a public cancer referral center in rural Rwanda. *BMC cancer* 2016; 16: 1-9.
45. Thomas M, Magwire M, Gosch K, et al. Cardiometabolic Center of Excellence: A Novel Care Delivery Model for Secondary Prevention of Cardiovascular Disease in Type 2 Diabetes. *Circulation: Cardiovascular Quality and Outcomes* 2021; 14: e007682.
46. Vivian E, Brooks MR, Longoria R, et al. Improving the Standard of Care for All—A Practical Guide to Developing a Center of Excellence. In: *Healthcare* 2021, p.777. MDPI.
47. Williams BR. Constructing a Hypertrophic Cardiomyopathy Center of Excellence. *Hypertrophic Cardiomyopathy*. Springer, 2015, pp.279-286.
48. Wirth M, Fossati N, Albers P, et al. The European prostate cancer centres of excellence: a novel proposal from the European Association of Urology prostate cancer centre consensus meeting. *European urology* 2019; 76: 179-186.
49. Wu S-J, Ma Q, Martin P, et al. Finding the Value in 'Value' Designation: Evidence and Opportunity in the United States. *Managed Care (Langhorne, Pa)* 2016; 25: 36-42.
50. Yao Q and Zhou G. Role of a center of excellence program in improving the quality of peritoneal dialysis—a Chinese experience. *Peritoneal dialysis international* 2014; 34: 59-62.

CoE – Centre of Excellence

\*Research article in peer reviewed journal

†Other in peer reviewed journal

‡Case report in peer reviewed journal
